1 **Longitudinal wastewater surveillance addressed public health priorities during the**  
2 **transition from “dynamic COVID-zero” to “opening up” in China: a population-based study**

3

4 **Authors:** Yinghui Li<sup>1, #</sup>, Chen Du<sup>1, #</sup>, Ziquan Lv<sup>1, #</sup>, Fuxiang Wang<sup>2, #</sup>, Liping Zhou<sup>3</sup>, Yuejing Peng<sup>4</sup>,  
5 Wending Li<sup>1</sup>, Yulin Fu<sup>1</sup>, Jiangteng Song<sup>5</sup>, Chunyan Jia<sup>5</sup>, Xin Zhang<sup>5</sup>, Mujun Liu<sup>6</sup>, Zimiao Wang<sup>6</sup>,  
6 Bin Liu<sup>6</sup>, Shulan Yan<sup>7</sup>, Yuxiang Yang<sup>7</sup>, Xueyun Li<sup>8</sup>, Yong Zhang<sup>8</sup>, Jianhui Yuan<sup>9</sup>, Shikuan Xu<sup>9</sup>,  
7 Miaoling Chen<sup>1</sup>, Xiaolu Shi<sup>1</sup>, Bo Peng<sup>1</sup>, Qiongcheng Chen<sup>1</sup>, Yaqun Qiu<sup>1</sup>, Shuang Wu<sup>1</sup>, Min Jiang<sup>1</sup>,  
8 Miaomei Chen<sup>1</sup>, Jinzhen Tang<sup>1</sup>, Lei Wang<sup>1</sup>, Lulu Hu<sup>1</sup>, Chengsong Wan<sup>4</sup>, Hongzhou Lu<sup>2, \*</sup>, Tong  
9 Zhang<sup>10, \*</sup>, Songzhe Fu<sup>11, \*</sup>, Xuan Zou<sup>1, \*</sup>, Qinghua Hu<sup>1, \*</sup>

10

11 <sup>1</sup> Shenzhen Center for Disease Control and Prevention, Shenzhen, China;

12 <sup>2</sup> Department of Infectious Diseases, Shenzhen Third People’s Hospital, Second Hospital Affiliated  
13 to Southern University of Science and Technology, Shenzhen, China;

14 <sup>3</sup> Health Commission of Shenzhen Municipality, Shenzhen, China;

15 <sup>4</sup> BSL-3 Laboratory (Guangdong), Guangdong Provincial Key Laboratory of Tropical Disease  
16 Research, School of Public Health, Southern Medical University, Guangzhou, China;

17 <sup>5</sup> Water Ecology and Environment Division, Shenzhen Ecology and Environment Bureau,  
18 Shenzhen, China;

19 <sup>6</sup> Futian District Water Authority, Shenzhen, China;

20 <sup>7</sup> Nanshan District Water Authority, Shenzhen, China;

21 <sup>8</sup> Futian District Center for Disease Control and Prevention, Shenzhen, China;

22 <sup>9</sup> Nanshan District Center for Disease Control and Prevention, Shenzhen, China;

23 <sup>10</sup> Environmental Microbiome Engineering and Biotechnology Laboratory, Center for  
24 Environmental Engineering Research, Department of Civil Engineering, The University of Hong  
25 Kong, Hong Kong, China;

26 <sup>11</sup> Key Laboratory of Environment Controlled Aquaculture (Dalian Ocean University) Ministry of  
27 Education, China.

28

29 # These authors contributed equally to the article

30 \* Corresponding authors:

31 Hongzhou Lu: [luhongzhou@fudan.edu.cn](mailto:luhongzhou@fudan.edu.cn), Tong Zhang: [zhangt@hku.hk](mailto:zhangt@hku.hk), Songzhe Fu:  
32 [fusongzhe@dlou.edu.cn](mailto:fusongzhe@dlou.edu.cn), Xuan Zou: [zoux@szcdc.net](mailto:zoux@szcdc.net), Qinghua Hu: [huqinghua03@163.com](mailto:huqinghua03@163.com)

33

34 **Summary**

35 **Background** Wastewater surveillance provides real-time, cost-effective monitoring of  
36 SARS-CoV-2 transmission. We developed the first city-level wastewater warning system in  
37 mainland China, located in Shenzhen. Our study aimed to reveal cryptic transmissions under the  
38 “dynamic COVID-zero” policy and characterize the dynamics of the infected population and  
39 variant prevalence, and then guide the allocation of medical resources during the transition to  
40 “opening up” in China.

41

42 **Methods** In this population-based study, a total of 1,204 COVID-19 cases were enrolled to  
43 evaluate the contribution of Omicron variant-specific faecal shedding rates in wastewater. After  
44 that, wastewater samples from up to 334 sites distributed in communities and port areas in two  
45 districts of Shenzhen covering 1.74 million people were tested daily to evaluate the sensitivity and  
46 specificity of this approach, and were validated against daily SARS-CoV-2 screening. After the  
47 public health policy was switched to “opening up” in December 7, 2022, we conducted  
48 wastewater surveillance at wastewater treatment plants and pump stations covering 3.55 million  
49 people to estimate infected populations using model prediction and detect the relative abundance  
50 of SARS-CoV-2 lineages using wastewater sequencing.

51

52 **Findings** In total, 82.4% of SARS-CoV-2 Omicron cases tested positive for faecal viral RNA  
53 within the first four days after the diagnosis, which was far more than the proportion of the  
54 ancestral variant. A total of 27,759 wastewater samples were detected from July 26 to November  
55 30 in 2022, showing a sensitivity of 73.8% and a specificity of 99.8%. We further found that  
56 wastewater surveillance played roles in providing early warnings and revealing cryptic  
57 transmissions in two communities. Based on the above results, we employed a prediction model to  
58 monitor the daily number of infected individuals in Shenzhen during the transition to “opening up”  
59 in China, with over 80% of the population infected in both Futian District and Nanshan District.  
60 Notably, the prediction of the daily number of hospital admission was consistent with the actual  
61 number. Further sequencing revealed that the Omicron subvariant BA.5.2.48 accounted for the  
62 most abundant SARS-CoV-2 RNA in wastewater, and BF.7.14 and BA.5.2.49 ranked second and  
63 third, respectively, which was consistent with the clinical sequencing.

64

65 **Interpretation** This study provides a scalable solution for wastewater surveillance of SARS-CoV-2  
66 to provide real-time monitoring of the new variants, infected populations and facilitate the precise  
67 prediction of hospital admission. This novel framework could be a One Health system for the  
68 surveillance of other infectious and emerging pathogens with faecal shedding and antibiotic  
69 resistance genes in the future.

70

71 **Funding** Sanming Project of Medicine in Shenzhen, Shenzhen Key Medical Discipline  
72 Construction Fund.

73 **Research in context**

74 **Evidence before this study**

75 We searched PubMed for articles published from December 1, 2019, to February 28, 2023,  
76 without any language restrictions, using the search terms “wastewater surveillance”,  
77 “SARS-CoV-2 shedding rate”, and “China”. After checking abstracts and full texts of the search  
78 results, we found that the field of wastewater-based epidemiology (WBE) has been considered as a  
79 powerful, rapid, and inexpensive tool to monitor SARS-CoV-2 transmission in recent years.  
80 Researchers realized that SARS-CoV-2 RNA in wastewater is mainly from the faecal virus  
81 shedding of infected individuals, and the number of infected individuals can be estimated using a  
82 prediction model based on the viral RNA load in wastewater and the faecal viral shedding rate.  
83 However, there are no published clinical data regarding the faecal shedding rates of the pandemic  
84 variant Omicron. In particular, no previous studies have reported the size of China’s SARS-CoV-2  
85 infection after the public health policy was switched to “opening up” in December 7, 2022.

86

87 **Added value of this study**

88 This study highlights pioneering work in the use of wastewater surveillance of SARS-CoV-2  
89 conducted during the transition from “dynamic COVID-zero” to “opening up” in China. The study  
90 reported first about the high proportion of faecal viral shedding of SARS-CoV-2 Omicron cases,  
91 showcasing the generality of wastewater surveillance for tracking Omicron prevalence. On the one  
92 hand, wastewater surveillance can play roles in providing early warnings and revealing cryptic  
93 transmissions and has the potential to replace city-wide nucleic acid screening under stringent  
94 control measures. On the flip side, wastewater surveillance allows for robust predictions of the  
95 number of infected individuals, the relative abundance of SARS-CoV-2 lineages, and the rate of  
96 hospital admission after the public health policy was switched to relaxed COVID-19 restrictions.

97

98 **Implications of all the available evidence**

99 Governments are in urgent need of a paradigm to shorten the time lag observed between  
100 recognition of a new emerging pathogen with the potential to cause the next pandemic (e.g.,  
101 SARS-CoV-2) and the development of public health response (e.g., early warning, management  
102 and control of the communities, allocation of medical resources). Our findings suggest that the  
103 system developed in this study is not only a valuable epidemiological tool to accurately monitor  
104 the infection trend but also transforms wastewater surveillance into a public health management  
105 framework, which could be a One Health system for the surveillance of other infectious and  
106 emerging pathogens with faecal shedding and antibiotic resistance genes.

107

## 108 **Introduction**

109 The limited population-based testing capacity of the SARS-CoV-2 pandemic triggered the  
110 wastewater-based epidemiology (WBE) method to assess COVID-19 prevalence. The theoretical  
111 basis of wastewater surveillance is that SARS-CoV-2 RNA in wastewater is mainly from the  
112 faecal virus shedding of infected persons.<sup>1-7</sup> To date, at least 72 countries and 288 universities and  
113 research institutes have carried out wastewater surveillance for SARS-CoV-2, which has played  
114 crucial roles in monitoring the infection trend and emerging variants, providing early warning  
115 signals for public health interventions.<sup>8-13</sup>

116 Recent studies have also shown the additional value of wastewater surveillance for the  
117 prediction of infected populations to guide public health actions. For instance, Ahmed et al.  
118 established a model to estimate the number of infected individuals based on the concentration of  
119 SARS-CoV-2 RNA, which was in agreement with clinical observations.<sup>14</sup> Fu et al. further  
120 considered the decay rate of SARS-CoV-2 RNA in the sewer system and proposed a revised model  
121 to reach an accurate perdition of infected persons.<sup>15</sup> The results from McMahan et al. also  
122 suggested that a modified susceptible-exposed-infectious-recovered (SEIR) model based on daily  
123 viral RNA load in wastewater provided rapid prevalence assessments of COVID-19 cases.<sup>16</sup>

124 Since 2020, the “dynamic COVID-zero” strategy has been adopted in China for nearly three  
125 years.<sup>17</sup> The core of this strategy is to take timely measures to lockdown the communities for 7-14  
126 days and quickly cut off the COVID-19 transmission chain. However, as the Omicron variant has  
127 become the dominant variant in the majority of countries in 2022 with a higher transmission  
128 capacity, the implementation of the “dynamic COVID-zero” strategy became unfeasible for most  
129 cities. Whether WBE would be a feasible solution to replace nucleic acid testing to monitor the  
130 infected population remains unknown. To this end, we first studied the faecal viral shedding rate  
131 of 1,204 COVID-19 cases in a designated hospital to evaluate the feasibility of wastewater  
132 surveillance for Omicron, and then we established a surveillance network in the Nanshan and  
133 Futian districts of Shenzhen City to evaluate the sensitivity and specificity of this approach.  
134 Afterward, since December 3, we conducted wastewater surveillance in wastewater treatment  
135 plants (WWTPs) and pump stations to monitor the dynamics of virus concentration and  
136 composition of variants. Finally, we adopted a predictive model to predict the number of infected  
137 persons during the transition from “dynamic COVID-zero” to “opening up”,<sup>14</sup> which provided  
138 timely information for policy makers and guided the allocation of medical resources to address  
139 this pandemic.

140

## 141 **Methods**

### 142 **Study of faecal viral shedding of the Omicron variant**

143 From August 9 to October 30, 2022, 1,204 infected individuals hospitalized in the Third People’s  
144 Hospital of Shenzhen, a designated hospital for COVID-19 cases in Shenzhen, were included in  
145 the study, and the hospital admission data were collected from electronic medical records of the  
146 hospital. Faecal samples were collected daily using sterilized cotton swabs and placed in  
147 SARS-CoV-2 inactivated sampling tubes. The GeneRotex96 automatic nucleic acid extraction  
148 platform (TIANLONG, China) was used to extract nucleic acids from samples, and the novel  
149 coronavirus 2019-nCoV nucleic acid detection kit (HybriBio, China) and ABI Prism7500 real-time  
150 PCR instrument (HybriBio, China) were used to perform RT-qPCR detection of SARS-CoV-2  
151 RNA according to the manufacturer’s instructions. A positive faecal sample indicated that at least

152 one target gene (*ORF1ab* or *N*) had a signal under the cut-off cycle threshold (Ct) value of 40. To  
153 unify the standard of quantification, the final viral concentration in faecal samples was calculated  
154 using the standard curve of *N*-carrying plasmids. Details about the quantitative analysis of viral  
155 loads in faeces are provided in the appendix.1 (p 1). Ethical approval for this study was provided  
156 by the ethical review board of Shenzhen CDC.

157

### 158 **Wastewater surveillance in port areas**

159 Tentative wastewater surveillance was conducted in the districts of Futian and Nanshan of  
160 Shenzhen City. From July 26 to November 30, up to 334 sampling sites covering 1.74 million  
161 people were selected according to the potential risk of the infected persons imported from Hong  
162 Kong.<sup>18</sup> The average population covered by each sampling site was approximately 5,200  
163 (50-70,000). Since December 3, we have conducted wastewater surveillance only at six WWTPs  
164 and nine pump stations in Futian District and Nanshan District. The population covered by each  
165 WWTP was approximately 592,000 (65,000-850,000), the population covered by each pump  
166 station was approximately 150,000 (10,000-572,000), and the total population was estimated to be  
167 approximately 3.55 million. Details about quantity changes, location, cover area, population and  
168 sewage flow of sampling sites are provided in the appendix.3-5 (pp 2-4).

169 From July 26 to November 30, wastewater was collected continuously from 8-11 am or 10-12  
170 am based on the peak water consumption at each sampling point with 250 mL collected every 15  
171 minutes, and 3 L of wastewater was collected in total. Since December 3, 2022, wastewater was  
172 collected continuously in 24 hours at each WWTP or pump station with 125 mL collected every  
173 hour, and 3 L of wastewater was collected in total. Wastewater samples were inactivated by a  
174 water bath at 60°C for 30 minutes and then enriched and concentrated by a modified “PEG  
175 precipitation method”.<sup>19</sup> Nucleic acid extraction was performed using automatic nucleic acid  
176 extraction platform HBNP-9601A (HybriBio, China) or GENEDIAN EB1000 (DIAN  
177 Biotechnology, China). RT-qPCR detection and quantification were conducted as mentioned above.  
178 Details about the quantitative analysis of viral loads in wastewater are provided in the appendix.2  
179 (p 1).

180

### 181 **Sequencing and analysis**

182 Wastewater sequencing was performed on the BGI sequencing platform. Reverse transcription and  
183 amplification were performed using the ATOplex RNA Multiplex PCR Amplification Kit V3.1  
184 before library construction. DNA libraries were prepared using the MGIEasy Fast PCR-FREE  
185 digestion Library Preparation kit. Sequencing was completed on the DNBSEQ-G99 sequencing  
186 platform using the single-end sequencing 100 bp+ double-end barcode (SE100+10+10) strategy.  
187 The MGI MetargetCOVID software was used to complete the parametric assembly of  
188 SARS-CoV-2 sequences, and then the mutation branches and mutation sites of SARS-CoV-2  
189 sequences were obtained using nextclade and Pangolin analysis websites. Single-nucleotide  
190 polymorphisms (SNPs) were identified using Snippy (<https://github.com/tseemann/snippy>) by  
191 mapping sequencing reads to the reference genome (MN908947.3, Wuhan-Hu-1). SNP distances  
192 between viral genomes were calculated based on concatenated SNPs using snp-dists  
193 (<https://github.com/tseemann/snp-dists>).<sup>20</sup>

194 To determine SARS-CoV-2 lineage abundance in wastewater, we first performed quality  
195 control, alignment and primer sequence trimming using MGI MetargetCOVID software. In brief,

196 sequencing reads were aligned to the reference sequence (MN908947.3) with BWA mem, and  
197 reads with hard or soft clips >10 were filtered using the SAMclip method. The resulting bam files  
198 were used to calculate the sequencing depth and coverage by samtools, where samples with less  
199 than 60% genome coverage were excluded. We used the Freyja tool (v1.3.12) to recover the  
200 relative abundances of SARS-CoV-2 lineages from wastewater samples using lineage-defining  
201 mutational “barcodes” derived from the USHER global phylogenetic tree (as of January 29, 2023).  
202 <sup>21</sup> Lineages were excluded if they either had overall low abundance (<1%) or showed low minor  
203 allele frequency (<1%) or sequencing depth (<10X) in their defining mutations.

204 Clinical sequencing data of 478 human oropharyngeal swab samples were collected from  
205 “dynamic COVID-zero” case report before December 6 and COVID-19 integrated surveillance  
206 system after December 7, which were published by Health Commission of Shenzhen Municipality.  
207

### 208 **Prediction of infected persons based on WBE**

209 We first calculated the decay rate of SARS-CoV-2 RNA in a wastewater pipeline by the following  
210 equation:

$$211 \quad \log\left(\frac{C_d}{C_0}\right) = -k * d \quad (1)$$

212 where  $C_0$  and  $C_d$  are the SARS-CoV-2 RNA concentrations in the wastewater at travel distances of  
213 0 and  $d$  km, respectively.  $d$  is the distance from a community to a WWTP, and  $k$  is the decay rate  
214 constant, which is 0.12 in winter, as suggested by our previous study.<sup>15</sup> As  $C_d$  was obtained by  
215 qPCR assay in the WWTP, we then used Eq. (1) to obtain  $C_0$ , which is the corrected SARS-CoV-2  
216 RNA concentration.

217 Afterwards, the daily number of actively infected persons in the catchment of a WWTP can  
218 be estimated on the basis of the number of virus copies present in sewage (numerator) and the  
219 amount of virus shedding per person per day (denominator) by the following equations (2):

$$220 \quad \text{Infected persons} = \frac{C_0 * \left(\frac{\text{liters wastewater}}{\text{day}}\right)}{\left(\frac{\text{g feces}}{\text{person-day}}\right) * \left(\frac{\text{RNA copies}}{\text{g feces}}\right) * 0.824} \quad (2)$$

221 where 0.824 is the shedding rate of the infected population as determined by the previous section.

222 In the above equation, the amount of SARS-CoV-2 RNA copies/g in feces per person was  
223 modelled as a log-uniform distribution ranging from 4.2 to 9.67  $\log_{10}$  copies/g as determined by  
224 the previous section. The amount of faecal production per person was set at 128 g per day. Based  
225 on Equation (2), the Monte Carlo simulation was conducted with ModelRisk version 6.0. The  
226 number of iterations per simulation was 10,000. The predicted infection cases are reported as the  
227 median and 95% confidence interval (CI) determined by bootstrapping the model with 100  
228 experiments.

229

### 230 **Hospitalization data collection in Nanshan district**

231 We obtained medical records and compiled data for hospitalized patients with  
232 laboratory-confirmed COVID-19 in Nanshan district, as reported to the Health Commission of  
233 Shenzhen Municipality between December 12, 2022, and January 10, 2023.

234

### 235 **Data analysis**

236 The collection and testing of faecal and wastewater samples were recorded using Microsoft Excel  
237 version 2210. Significance analysis of faecal viral shedding proportion and load between

238 participants were analysed using IBM SPSS Statistics 27. Wastewater data were plotted and  
239 statistically analysed using GraphPad Prism version 8.4.0 (GraphPad Software, La Jolla, CA,  
240 USA).

241

#### 242 **Role of the funding source**

243 The funders of the study had no role in study design, data collection, data analysis, data  
244 interpretation, or writing of the report.

245

## 246 **Results**

### 247 **Faecal viral shedding dynamics of SARS-CoV-2 Omicron cases**

248 A total of 1,204 COVID-19 cases were enrolled to analyse the dynamics of faecal viral shedding.  
249 Viral variants were identified in 80.2% of participants and were all classified as Omicron, mainly  
250 including BA.5.2, BF.7 and BA.5.2.1 (Table 1). As shown in the appendix.6 (p 5), 63.6% (171/269)  
251 of participants tested positive for faecal SARS-CoV-2 RNA on day 1 (the next day after the  
252 diagnosis), and the faecal viral shedding proportion gradually increased to 71.5% (447/625) on  
253 day 4 and then gradually declined to 52.4% (98/187) on day 7, 21.8% (212/973) in the second  
254 week and 10.3% (23/223) in the third week. As the faecal viral shedding proportion peaked on day  
255 4, the period from day 0 to day 4 was defined as the acute period of faecal viral shedding, and  
256 82.4% (833/1,011) of participants tested positive for faecal SARS-CoV-2 RNA during the acute  
257 period, indicating the utility of wastewater surveillance in reflecting the majority of the infected  
258 population. A decline in faecal viral RNA concentration was observed since enrolment in the study,  
259 particularly obvious from day 4 to day 7 (appendix.6 p 5). The faecal viral loads of participants  
260 during the acute period ranged from  $1.6 \times 10^4$  to  $4.1 \times 10^{10}$  copies/g with a mean value of  $6.7 \times 10^7$   
261 copies/g.

262 We also analysed factors influencing faecal viral shedding during the acute period, including  
263 subvariant of Omicron, sex, age, symptom and vaccination (appendix.7 p 6). The faecal viral  
264 shedding proportion of Omicron subvariant BA.2.76 (100%, 29/29) was higher than that of  
265 BA.5.2 (85.8%, 503/586), BA.5.2.1 (83.6%, 51/61) and BF.7 (75.4%, 46/61), while there was no  
266 significant difference between their faecal viral loads ( $p=0.2744$ ). The faecal viral shedding  
267 proportion gradually increased with age. Notably, the proportion and viral load of faecal viral  
268 shedding of people aged 60 years and older was significantly greater than that of children under 9  
269 years old ( $p=0.000914$ ,  $p=0.0094$ , respectively). No significant difference ( $p>0.05$ ) in the  
270 proportion and viral load of faecal viral shedding was found between females and males, between  
271 mild cases and asymptomatic carriers, or between participants inoculated with inactivated vaccine  
272 and participants unvaccinated, suggesting the generality of wastewater surveillance for different  
273 population groups.

274

### 275 **Tentative wastewater surveillance during the “dynamic COVID-zero” period**

276 As faecal shedding occurred in the majority of the population, we conducted tentative wastewater  
277 surveillance in the Nanshan and Futian districts of Shenzhen City with up to 334 wastewater  
278 sampling sites to evaluate sensitivity and specificity and evaluate whether wastewater surveillance  
279 can help nucleic acid tests find missed infected persons (figure 1A). Measures including early  
280 warning, building-level tracing and wastewater sequencing were adopted after SARS-CoV-2 RNA  
281 was detected in wastewater (appendix.8 p 7).

282 From July 26 to November 30, 2022, 27,759 wastewater samples were collected, of which  
283 239 tested positive. Very good agreement was observed between the number of positive sites  
284 detected by both wastewater surveillance and daily city-wide nucleic acid screening (figure 2A).  
285 Associated cases could be found in the coverage area of 77.8% (186/239) of sampling sites that  
286 tested positive, indicating that wastewater surveillance allows early warning of new cases in the  
287 coverage area. However, 26.2% (66/252) of the sampling sites that tested positive by daily  
288 city-wide nucleic acid screening were missed by wastewater surveillance, indicating that there was  
289 a certain proportion of missing inspection in wastewater surveillance, which might be caused by  
290 the fact that a fraction of infected individuals did not shed virus or shed virus beyond the time of  
291 wastewater sampling. Wastewater surveillance had a sensitivity of 73.8% and a specificity of  
292 99.8% (figure 2B).

293 Next, we found two cryptic transmission events that were missed by daily city-wide nucleic  
294 acid screening (appendix.9 p 8). From August 9 to September 21, 2022, routine wastewater  
295 surveillance did not detect SARS-CoV-2 circulation in the Badeng community until SARS-CoV-2  
296 RNA was identified continuously in wastewater from September 22 to 24. Then, nucleic acid  
297 screening found two infected individuals on September 24th, with negative results on September  
298 22nd and 23rd. Analysis of viral genomes revealed only one SNP difference between two infected  
299 individuals and the 23rd wastewater sample with a coverage of 93%, indicating that SARS-CoV-2  
300 RNA in wastewater was from these two infected individuals. In another case, two outbreaks,  
301 NS1013 caused by Omicron subvariant BF.7 and NS1029 caused by BA.5.2.1, occurred in  
302 Nanshan community in October 2022, both of which were provided early warning through routine  
303 wastewater surveillance. However, SARS-CoV-2 RNA continued to be detected in wastewater in  
304 November and December, but no new infected individuals were found in the coverage area. These  
305 results demonstrate that wastewater surveillance has played roles in early warnings and revealing  
306 cryptic transmissions, suggesting that wastewater surveillance is an alternative to nucleic acid  
307 testing under stringent control measures.

308

### 309 **Wastewater surveillance during the transition to “opening up”**

310 On December 7, 2022, authorities switched the public health policy from “dynamic COVID-Zero”  
311 to “opening up”. After that, we conducted wastewater surveillance only at the WWTP and pump  
312 station to assess the impact of policy change on the epidemic situation of COVID-19 in Shenzhen  
313 (figure 1B). Measured concentrations of SARS-CoV-2 RNA showed two waves of the COVID-19  
314 pandemic on approximately December 20 and 27, respectively, and peaked on December 27 in  
315 both Futian and Nanshan districts (figure 3), suggesting that the COVID-19 pandemic in Shenzhen  
316 reached its peak on December 27.

317 Based on the concentration of SARS-CoV-2 RNA in wastewater and the average faecal viral  
318 shedding rate of Omicron for individuals, we first adopted Ahmed’s model to predict the daily  
319 number of existing infected individuals and cumulative infection rates in the Futian and Nanshan  
320 districts of Shenzhen from December 3, 2022, to January 20, 2023. Initially, we compared the  
321 prediction results based on wastewater data from a WWTP in Futian District (WWTP-FT03) with  
322 the infected persons detected by city-wide nucleic acid screening from December 3<sup>rd</sup> to 7<sup>th</sup> of 2022  
323 (appendix.10 p 9). The results showed that the number of predicted persons was in line with the  
324 ones obtained from nucleic acid screening except for the data from December 7<sup>th</sup> (city-wide  
325 nucleic acid screening was only partially implemented on that day). In Futian District, the first



326 wave of the COVID-19 pandemic occurred on approximately December 20, 2022, when 291,395  
327 cases were predicted. The second wave appeared around December 27, 2022, with 977,524 cases  
328 estimated (figure 4A). Likewise, the first wave in Nanshan District was also observed around  
329 December 20, which recorded 362,264 cases. The second wave was witnessed on December 28,  
330 with 411,785 predicted cases (figure 4B). On January 20, 2023, the cumulative rate of infections  
331 in Futian district was as high as 93·8%, while the cumulative rate of infections in Nanshan district  
332 was approximately 81·6%.

333 Furthermore, we adopted the research results from Jassat et al. and Nyberg et al. and  
334 estimated that 2·2% of elderly infected persons (age >65), 1% of children aged below 5 and  
335 0·05% of remaining infected persons required hospital admission.<sup>22,23</sup> Thus, we calculated the  
336 daily number of hospital admissions based on wastewater data. Relative to the actual number of  
337 hospital admissions in Nanshan district, the prediction of hospital admission was slightly higher  
338 than the actual number with no significant difference, with a total of 2,815 predicted inpatients  
339 (figure 4C). In addition, the predicted peak of hospital admission was 1-2 days earlier than the  
340 actual peak, indicating the value of prediction for early warning and preparedness of medical  
341 resources.

342 To monitor the relative abundance of variants in wastewater, we selected 37 representative  
343 wastewater samples collected from December 13, 2022, to January 17, 2023, for sequencing. For  
344 comparison, we also analysed the clinical sequencing data of 478 human oropharyngeal swab  
345 samples collected from December 1, 2022, to January 13, 2023 (appendix.11 p 10). Wastewater  
346 sequencing revealed that 36 subvariants existed in wastewater, BA.5.2.48 accounted for the vast  
347 majority (62·4%), and BF.7.14 (24·6%) and BA.5.2.49 (5·6%) ranked second and third,  
348 respectively, which was consistent with clinical sequencing (figure 5). These subvariants were  
349 branches of BA.5.2 and BF.7, which were first detected in travelers from Hong Kong in July and  
350 October 2022, indicating the tremendous input risk of the port areas in Shenzhen adjacent to Hong  
351 Kong. Additionally, we found extra 29 variants with low abundance compared to clinical  
352 sequencing, indicating a low level of cryptic transmissions in Shenzhen. These results suggested a  
353 low degree of virus variation in the COVID-19 pandemic in Shenzhen during the transition from  
354 “dynamic COVID-zero” to “opening up” in China. No new emerging SARS-CoV-2 variants with  
355 the potential to cause the next pandemic (e.g., BQ.1.1, XBB.1.5 and CH.1.1) have been found by  
356 either wastewater sequencing or clinical sequencing efforts.

357

## 358 **Discussion**

359 In this study, we first demonstrated that faecal viral shedding occurred in the majority of  
360 SARS-CoV-2 Omicron cases regardless of sex, symptoms and inoculation of inactivated vaccine,  
361 suggesting the generality of wastewater surveillance for tracking Omicron prevalence. After that,  
362 we employed WBE to monitor SARS-CoV-2 in up to 334 sampling sites and found that  
363 wastewater surveillance had a sensitivity of 73·8% and a specificity of 99·8%, contributing to the  
364 potential to replace nucleic acid tests. Based on the above findings, we adopted daily wastewater  
365 surveillance in 15 WWTP or pump station sites in two districts, which showed the robustness of  
366 wastewater surveillance in reflecting the infected population and the relative abundance of  
367 SARS-CoV-2 lineages after the switch of policy transmitted to “opening up”.

368 The previous studies on faecal viral shedding of COVID-19 cases mainly focused on the  
369 ancestral variant, and the proportion of faecal viral shedding of the ancestral variant was 21% to

370 59%.<sup>24-30</sup> We conducted the study with a sample size of over 1,000 infected cases, which provided  
371 valuable information for the utility of wastewater surveillance. In total, 82.4% (n=1,011) of  
372 participants had samples collected during the acute period, indicating that wastewater surveillance  
373 by Omicron was a reliable approach to monitor infection trends. The range of faecal viral load of  
374 participants during the acute period was  $1.6 \times 10^4$  to  $4.1 \times 10^{10}$  copies/g with a mean value of  
375  $6.7 \times 10^7$  copies/g, which was consistent with previous studies<sup>1,31-33</sup>, indicating little difference  
376 between SARS-CoV-2 variants.

377 City-wide SARS-CoV-2 nucleic acid screening has been an efficient tool in China to estimate  
378 the prevalence of infection, which could inform pandemic management.<sup>34</sup> However, the cost and  
379 its considerable inconvenience on people's daily life and social functioning are unaffordable. In  
380 our study, relative to daily city-wide nucleic acid screening, wastewater surveillance provided a  
381 robust and affordable method for estimating the prevalence of infected persons in Shenzhen. It had  
382 a sensitivity of 73.8% and a specificity of 99.8% compared to daily city-wide nucleic acid  
383 screening, demonstrating the replaceability of this approach in reflecting the overall infection  
384 trends. Moreover, wastewater surveillance has played roles in early warning and revealing cryptic  
385 transmission in communities in Shenzhen. Therefore, wastewater surveillance could be used as an  
386 alternative method of population-based nucleic acid screening to produce actionable data for  
387 public health interventions for new emerging pathogens, such as SARS-CoV-2.

388 In this study, for any given sewershed, the numbers of infected cases were calculated and  
389 modelled by using the daily sewage flow rate multiplied by the virus RNA concentration divided  
390 by the RNA copies per person per day. The results showed that over 80% of the population was  
391 infected in both Futian District and Nanshan District. This is consistent with the public health data  
392 of Guangdong Province.<sup>35</sup> This approach has been widely used in previous studies with great  
393 success.<sup>14-16,36</sup> With the data of predicted infected cases and hospital admissions, policy makers  
394 now have a new valuable tool to tailor policy and make some critical decisions. For instance, the  
395 increase in predicted infected cases can serve as a leading indicator implying that active  
396 transmission is underway, even before new cases do not visit the hospitals. In particular, if a rapid  
397 increase in predicted cases is observed, public health authorities can predict hospital admission in  
398 the next few days and can be better prepared to arrange hospital beds and allocate medical  
399 resources. Additionally, once RNA levels decline sufficiently, wastewater surveillance can once  
400 again be used as a critical indicator of a resurgence of transmission.

401 Our study has three limitations. First, there was a lack of continuous faecal samples collected  
402 during the study of faecal viral shedding. Only faecal samples of 92 participants were collected  
403 daily from day 1 to day 4, and 93.5% of them tested positive for faecal SARS-CoV-2 RNA during  
404 the acute period. In addition, we conducted wastewater surveillance on December 12 in Nanshan  
405 District, which was five days later than December 7 (opening day) and might underestimate the  
406 infection rate in the first wave of the COVID-19 pandemic. Finally, the model predictions rely on  
407 several key parameters with considerable variations, including the distribution of shedding rates,  
408 temperature of the sewage, and decay rate of the RNA in the sewer system, resulting in high  
409 variability of the modelling results. Furthermore, this study did not encompass the effect of  
410 variants, which might slightly alter the model inputs. Further investigations are needed to improve  
411 this proposal. However, given the reliability of the modelling approach validated by previous  
412 studies,<sup>14-16</sup> we can safely reach the conclusion that SARS-CoV-2 quickly infected the majority of  
413 populations in the studied regions.

414 This study provided the first study of faecal viral shedding dynamics of Omicron, and  
415 tentative wastewater surveillance also demonstrated that wastewater surveillance has high  
416 sensitivity and specificity to replace nucleic acid tests for monitoring SARS-CoV-2. Based on  
417 these findings, we conducted wastewater surveillance in WWTPs and pump stations, monitored  
418 the infection trends and estimated the dynamics of populations in two border districts in Shenzhen.  
419 This is the first epidemiological description during the transition from “dynamic COVID-zero” to  
420 “opening up” in China. Predicted COVID-19 cases based on wastewater surveillance  
421 demonstrated that the majority of persons in the studied regions were infected, indicating a huge  
422 impact of policy change on the transmission of COVID-19. Our findings suggest that  
423 SARS-CoV-2 in wastewater also transforms wastewater epidemiology into a public health  
424 management framework, which could be a One Health system for the surveillance of other  
425 emerging pathogens with faecal viral shedding and antibiotic resistance genes in the future.

426

#### 427 **Contributors**

428 QH, YL, XZ, SF, TZ, HL, LZ designed, initiated and coordinated the study. YL, CD and ZL wrote  
429 the first draft. FW organized the collection of faecal samples. CD, ZL, SF, YP, WL and YF  
430 accessed and verified the data and made the tables and figures. JS, CJ, XZ, ML, ZW, BL, SY and  
431 YY contributed to wastewater sampling point layout and sample collection. XL, JY and SX  
432 contributed to epidemiological investigation. YZ, MLC, XS, BP, QC, YQ, SW, MJ, MMC, JT, LW  
433 and LH contributed to sample testing and data acquisition. QH, XZ, SF, TZ, HL and CW reviewed  
434 and revised the manuscript. All authors approved the final version. All authors had full access to  
435 all the data in the study and had final responsibility for the decision to submit for publication.

436

#### 437 **Declaration of interests**

438 We declare no competing interests.

439

#### 440 **Data sharing**

441 All data needed to evaluate the conclusions in the Article are present in the main Article text and  
442 in the appendix. All raw sequencing data are available via the NCBI Sequence Read Archive under  
443 the BioProject ID PRJNA937922.

444

#### 445 **Acknowledgments**

446 This work was supported by the Sanming Project of Medicine in Shenzhen (SZSM201811071)  
447 and Shenzhen Key Medical Discipline Construction Fund (SZXK064). We thank the professors of  
448 Jianguo Xu, Zijian Feng, Ruifu Yang, Biao Kan, Wenbo Xu, Song Tang, Lan Zhang, and Jianfeng  
449 He from Chinese Center for Disease Control and Prevention (JX, BK, WX, ST and LZ), Chinese  
450 Preventive Medicine Association (ZF), Academy of Military Medical Sciences (RY) and  
451 Guangdong Provincial Center for Disease Control and Prevention (JH) for their professional  
452 advising on the establishment of wastewater surveillance system in Shenzhen. We thank Prof.  
453 Chao Yang for his guidance on sequencing analysis. We also thank the teams of Shenzhen  
454 HybriBio Medical Laboratory and ShenZhen DiAn HuXin Medical Laboratory for their  
455 contributions on sample testing.

456

#### 457 **Reference**

- 458 1. Crank K, Chen W, Bivins A, Lowry S, Bibby K. Contribution of SARS-CoV-2 RNA  
459 shedding routes to RNA loads in wastewater. *Sci Total Environ* 2022; **806**(Pt 2): 150376.
- 460 2. Wannigama DL, Amarasiri M, Hurst C, et al. Tracking COVID-19 with wastewater to  
461 understand asymptomatic transmission. *Int J Infect Dis* 2021; **108**: 296-9.
- 462 3. Lodder W, de Roda Husman AM. SARS-CoV-2 in wastewater: potential health risk, but also  
463 data source. *Lancet Gastroenterol Hepatol* 2020; **5**(6): 533-4.
- 464 4. Peccia J, Zulli A, Brackney DE, et al. Measurement of SARS-CoV-2 RNA in wastewater  
465 tracks community infection dynamics. *Nat Biotechnol* 2020; **38**(10): 1164-7.
- 466 5. Wu F, Zhang J, Xiao A, et al. SARS-CoV-2 Titers in Wastewater Are Higher than Expected  
467 from Clinically Confirmed Cases. *mSystems* 2020; **5**(4).
- 468 6. Medema G, Heijnen L, Elsinga G, Italiaander R, Brouwer A. Presence of  
469 SARS-Coronavirus-2 RNA in Sewage and Correlation with Reported COVID-19 Prevalence in  
470 the Early Stage of the Epidemic in The Netherlands. *Environmental Science & Technology Letters*  
471 2020; **7**(7): 511-6.
- 472 7. Guo M, Tao W, Flavell RA, Zhu S. Potential intestinal infection and faecal-oral transmission  
473 of SARS-CoV-2. *Nat Rev Gastroenterol Hepatol* 2021; **18**(4): 269-83.
- 474 8. Daughton CG. Wastewater surveillance for population-wide Covid-19: The present and  
475 future. *Sci Total Environ* 2020; **736**: 139631.
- 476 9. COVIDPoops19 Summary of Global SARS-CoV-2 Wastewater Monitoring Efforts by UC  
477 Merced Researchers. 2023.  
478 [https://ucmerced.maps.arcgis.com/apps/opsdashboard/index.html#/c778145ea5bb4daeb58d31afee](https://ucmerced.maps.arcgis.com/apps/opsdashboard/index.html#/c778145ea5bb4daeb58d31afee389082)  
479 [389082](https://ucmerced.maps.arcgis.com/apps/opsdashboard/index.html#/c778145ea5bb4daeb58d31afee389082) (accessed Feb 28 2023).
- 480 10. Bowes DA, Driver EM, Kraberger S, et al. Leveraging an established neighbourhood-level,  
481 open access wastewater monitoring network to address public health priorities: a population-based  
482 study. *Lancet Microbe* 2023; **4**(1): e29-e37.
- 483 11. Monthly statistics for the Environmental Monitoring for Health Protection (EMHP)  
484 wastewater programme (England). 2023.  
485 [https://www.gov.uk/government/collections/monthly-statistics-for-the-environmental-monitoring-f](https://www.gov.uk/government/collections/monthly-statistics-for-the-environmental-monitoring-for-health-protection-emhp-wastewater-program-england)  
486 [or-health-protection-emhp-wastewater-program-england](https://www.gov.uk/government/collections/monthly-statistics-for-the-environmental-monitoring-for-health-protection-emhp-wastewater-program-england) (accessed Feb 28 2023).
- 487 12. Jahn K, Dreifuss D, Topolsky I, et al. Early detection and surveillance of SARS-CoV-2  
488 genomic variants in wastewater using COJAC. *Nat Microbiol* 2022; **7**(8): 1151-60.
- 489 13. Xu X, Zheng X, Li S, et al. The first case study of wastewater-based epidemiology of  
490 COVID-19 in Hong Kong. *Sci Total Environ* 2021; **790**: 148000.
- 491 14. Ahmed W, Angel N, Edson J, et al. First confirmed detection of SARS-CoV-2 in untreated  
492 wastewater in Australia: A proof of concept for the wastewater surveillance of COVID-19 in the  
493 community. *Sci Total Environ* 2020; **728**: 138764.
- 494 15. Fu S, He F, Wang R, et al. Development of quantitative wastewater surveillance models  
495 facilitated the precise epidemic management of COVID-19. *Sci Total Environ* 2023; **857**(Pt 1):  
496 159357.
- 497 16. McMahan CS, Self S, Rennert L, et al. COVID-19 wastewater epidemiology: a model to  
498 estimate infected populations. *Lancet Planet Health* 2021; **5**(12): e874-e81.
- 499 17. Liu J, Liu M, Liang W. The Dynamic COVID-Zero Strategy in China. *China CDC Wkly*  
500 2022; **4**(4): 74-5.
- 501 18. Deng Y, Zheng X, Xu X, et al. Use of Sewage Surveillance for COVID-19: A Large-Scale

- 502 Evidence-Based Program in Hong Kong. *Environ Health Perspect* 2022; **130**(5): 57008.
- 503 19. Zheng X, Wang M, Deng Y, et al. A rapid, high-throughput, and sensitive PEG-precipitation  
504 method for SARS-CoV-2 wastewater surveillance. *Water Res* 2023; **230**: 119560.
- 505 20. Yang C, Li Y, Jiang M, et al. Outbreak dynamics of foodborne pathogen *Vibrio*  
506 *parahaemolyticus* over a seventeen year period implies hidden reservoirs. *Nat Microbiol* 2022;  
507 **7**(8): 1221-9.
- 508 21. Karthikeyan S, Levy JI, De Hoff P, et al. Wastewater sequencing reveals early cryptic  
509 SARS-CoV-2 variant transmission. *Nature* 2022; **609**(7925): 101-8.
- 510 22. Jassat W, Abdool Karim SS, Ozougwu L, et al. Trends in Cases, Hospitalization and  
511 Mortality Related to the Omicron BA.4/BA.5 Sub-Variants in South Africa. *Clin Infect Dis* 2022.
- 512 23. Nyberg T, Ferguson NM, Nash SG, et al. Comparative analysis of the risks of hospitalisation  
513 and death associated with SARS-CoV-2 omicron (B.1.1.529) and delta (B.1.617.2) variants in  
514 England: a cohort study. *Lancet* 2022; **399**(10332): 1303-12.
- 515 24. Zhou JQ, Liu GX, Huang XL, Gan HT. The importance of fecal nucleic acid detection in  
516 patients with coronavirus disease (COVID-19): A systematic review and meta-analysis. *J Med*  
517 *Virol* 2022; **94**(6): 2317-30.
- 518 25. Gupta S, Parker J, Smits S, Underwood J, Dolwani S. Persistent viral shedding of  
519 SARS-CoV-2 in faeces - a rapid review. *Colorectal Dis* 2020; **22**(6): 611-20.
- 520 26. Natarajan A, Zlitni S, Brooks EF, et al. Gastrointestinal symptoms and fecal shedding of  
521 SARS-CoV-2 RNA suggest prolonged gastrointestinal infection. *Med (N Y)* 2022; **3**(6): 371-87 e9.
- 522 27. Zheng S, Fan J, Yu F, et al. Viral load dynamics and disease severity in patients infected with  
523 SARS-CoV-2 in Zhejiang province, China, January-March 2020: retrospective cohort study. *BMJ*  
524 2020; **369**: m1443.
- 525 28. Wang W, Xu Y, Gao R, et al. Detection of SARS-CoV-2 in Different Types of Clinical  
526 Specimens. *JAMA* 2020; **323**(18): 1843-4.
- 527 29. Lin W, Xie Z, Li Y, et al. Association between detectable SARS-COV-2 RNA in anal swabs  
528 and disease severity in patients with coronavirus disease 2019. *J Med Virol* 2021; **93**(2): 794-802.
- 529 30. Parasa S, Desai M, Thoguluva Chandrasekar V, et al. Prevalence of Gastrointestinal  
530 Symptoms and Fecal Viral Shedding in Patients With Coronavirus Disease 2019: A Systematic  
531 Review and Meta-analysis. *JAMA Netw Open* 2020; **3**(6): e2011335.
- 532 31. Wolfel R, Corman VM, Guggemos W, et al. Virological assessment of hospitalized patients  
533 with COVID-2019. *Nature* 2020; **581**(7809): 465-9.
- 534 32. Han MS, Seong MW, Kim N, et al. Viral RNA Load in Mildly Symptomatic and  
535 Asymptomatic Children with COVID-19, Seoul, South Korea. *Emerg Infect Dis* 2020; **26**(10):  
536 2497-9.
- 537 33. Lescure FX, Bouadma L, Nguyen D, et al. Clinical and virological data of the first cases of  
538 COVID-19 in Europe: a case series. *Lancet Infect Dis* 2020; **20**(6): 697-706.
- 539 34. Cao S, Gan Y, Wang C, et al. Post-lockdown SARS-CoV-2 nucleic acid screening in nearly  
540 ten million residents of Wuhan, China. *Nat Commun* 2020; **11**(1): 5917.
- 541 35. Guangzhou: over 85% of the population infected with SARS-CoV-2. 2023.  
542 [https://www.cnr.cn/gd/guangdongyaowen/20230118/t20230118\\_526130010.shtml](https://www.cnr.cn/gd/guangdongyaowen/20230118/t20230118_526130010.shtml) (accessed Feb  
543 28, 2023).
- 544 36. Prasek SM, Pepper IL, Innes GK, et al. Variant-specific SARS-CoV-2 shedding rates in  
545 wastewater. *Sci Total Environ* 2023; **857**(Pt 1): 159165.

| Participants (n=1204)         |              |
|-------------------------------|--------------|
| Sex                           |              |
| Male                          | 636 (52.8%)  |
| Female                        | 568 (47.2%)  |
| Age, years                    |              |
| 0-9                           | 78 (6.5%)    |
| 10-19                         | 83 (6.9%)    |
| 20-29                         | 209 (17.4%)  |
| 30-39                         | 297 (24.7%)  |
| 40-49                         | 247 (20.5%)  |
| 50-59                         | 203 (16.9%)  |
| 60-69                         | 66 (5.5%)    |
| 70-79                         | 15 (1.2%)    |
| 80-91                         | 6 (0.5%)     |
| Subvariant of the virus       |              |
| Omicron BA.5.2                | 710 (59.0%)  |
| Omicron BF.7                  | 70 (5.8%)    |
| Omicron BA.5.2.1              | 69 (5.7%)    |
| Omicron BA.2.2                | 37 (3.1%)    |
| Omicron BA.2.76               | 29 (2.4%)    |
| Omicron BF.15                 | 18 (1.5%)    |
| Omicron BA.5.1                | 10 (0.8%)    |
| Omicron BA.5.6                | 8 (0.7%)     |
| Omicron BA.2.12.1             | 5 (0.4%)     |
| Omicron BA.4.1                | 5 (0.4%)     |
| Omicron BA.2.3.11             | 1 (0.1%)     |
| Omicron BA.2.36               | 1 (0.1%)     |
| Omicron BA.5                  | 1 (0.1%)     |
| Omicron BA.5.3.1              | 1 (0.1%)     |
| Omicron BE.3                  | 1 (0.1%)     |
| Non-sequencing                | 238 (19.8%)  |
| Clinical Symptom Category     |              |
| Patients with mild symptoms   | 733 (60.9%)  |
| Asymptomatic cases            | 471 (39.1%)  |
| COVID-19 Vaccine Dose         |              |
| 0                             | 96 (8.0%)    |
| 1                             | 22 (1.8%)    |
| 2                             | 278 (23.1%)  |
| 3                             | 774 (64.3%)  |
| 4                             | 6 (0.5%)     |
| Information loss              | 28 (2.3%)    |
| COVID-19 Vaccine Type         |              |
| Inactivated vaccine           | 1020 (84.7%) |
| Recombinant protein vaccine   | 12 (1.0%)    |
| Adenovirus vector vaccine     | 11 (0.9%)    |
| mRNA vaccine                  | 18 (1.5%)    |
| Mix And match                 | 20 (1.7%)    |
| Not vaccinated                | 96 (8.0%)    |
| Information loss              | 27 (2.2%)    |
| Hospital Day(HOD)             |              |
| 3-7                           | 25 (2.1%)    |
| 8-14                          | 665 (55.2%)  |
| 15-21                         | 452 (37.5%)  |
| 22-28                         | 25 (2.1%)    |
| >28                           | 6 (0.5%)     |
| Information loss              | 31 (2.6%)    |
| Source Of Case                |              |
| Domestically transmitted case | 1061 (88.1%) |
| Imported case                 | 131 (10.9%)  |
| Information loss              | 12 (1.0%)    |

Data are mean (SD) or n (%).

**Table 1: Characteristics of participants included between August 9 and October 30, 2022**

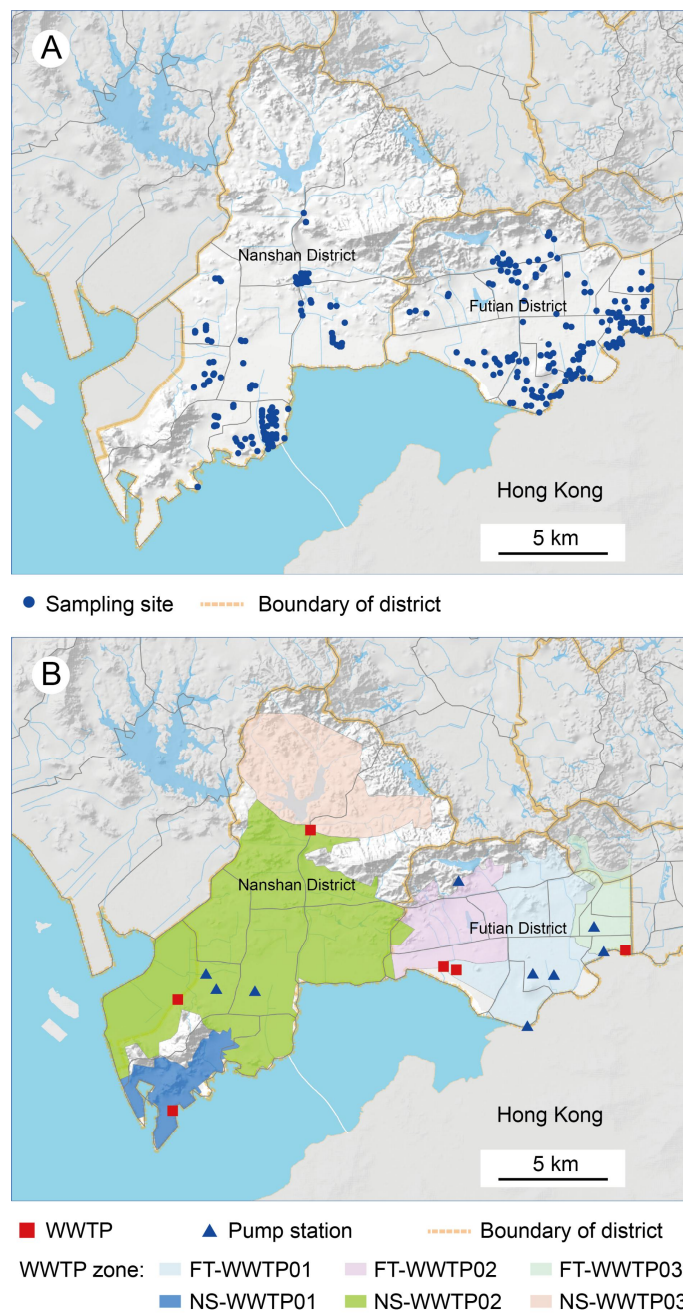

**Figure 1: Location of sampling sites for SARS-CoV-2 detection**

(A) During the “dynamic COVID-zero” period, from July 26 to November 30, 2022, up to 334 sampling sites were distributed in Futian District and Nanshan District. (B) After the switch of policy transmitted to “open-up”, from December 3, 2022 to January 20, 2023, wastewater surveillance was only conducted at 6 WWTPs and 9 pump stations in Futian District and Nanshan District.

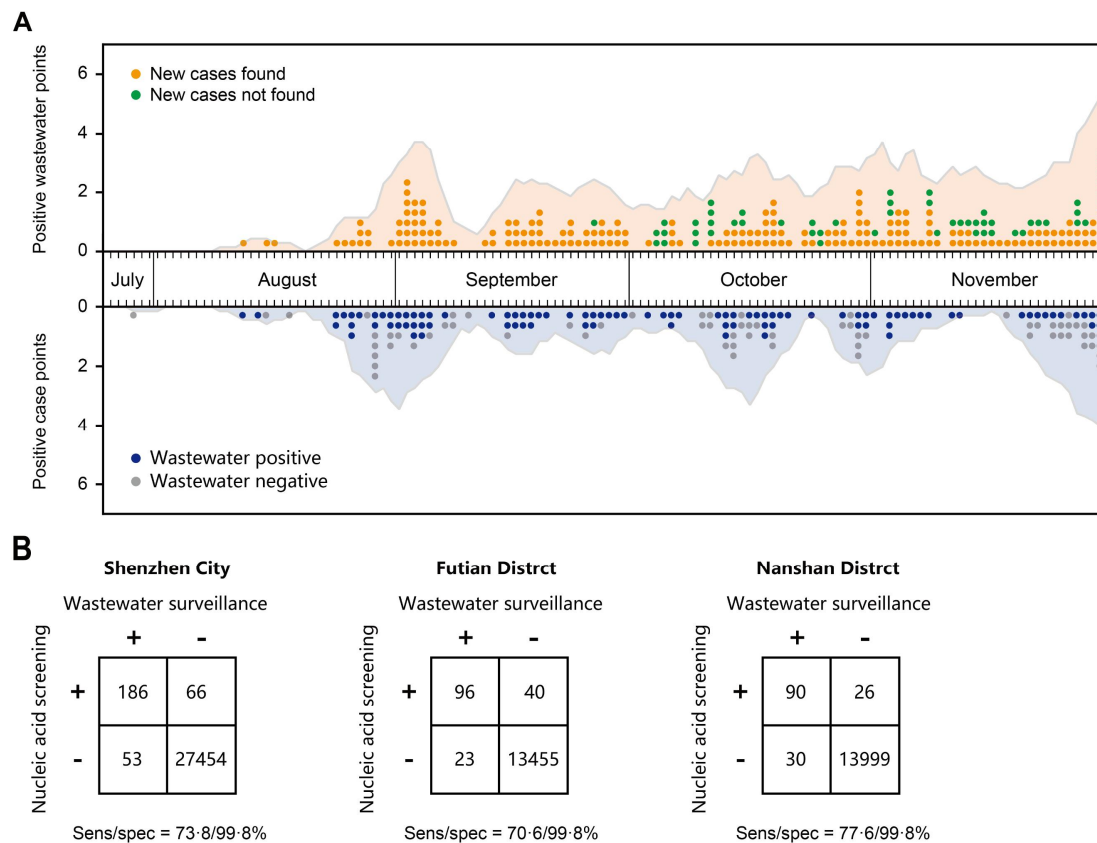

**Figure 2: Wastewater surveillance compared with daily city-wide SARS-CoV-2 nucleic acid screening**

(A) Reported number of positive sites found by wastewater surveillance and daily nucleic acid screening in Futian District and Nanshan District, and a 7-day trailing average (outline of the light yellow and light blue zone). (B) Contingency tables for wastewater surveillance and daily city-wide SARS-CoV-2 nucleic acid screening validation sets in Shenzhen City, Futian District, and Nanshan District, respectively.



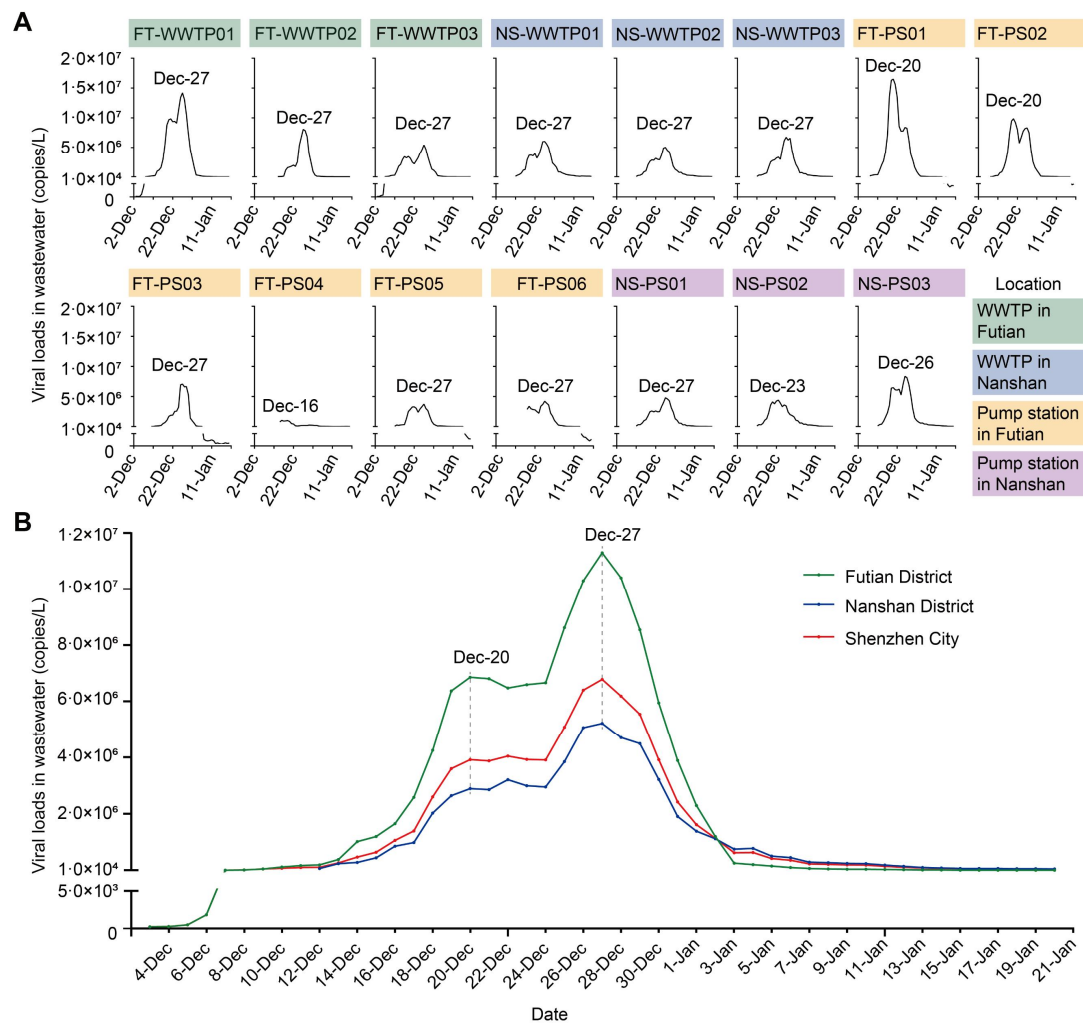

**Figure 3: Wastewater-derived viral loads of SARS-CoV-2 in Shenzhen after the public health policy was switched to “open-up”**

(A) Viral loads of SARS-CoV-2 in wastewater (a 5-day trailing average) in 6 WWTPs and 9 pump stations in Futian District and Nanshan District. (B) Viral loads in wastewater (a weighted average of WWTPs) in Futian District, Nanshan District, and Shenzhen City (a weighted average of two districts).

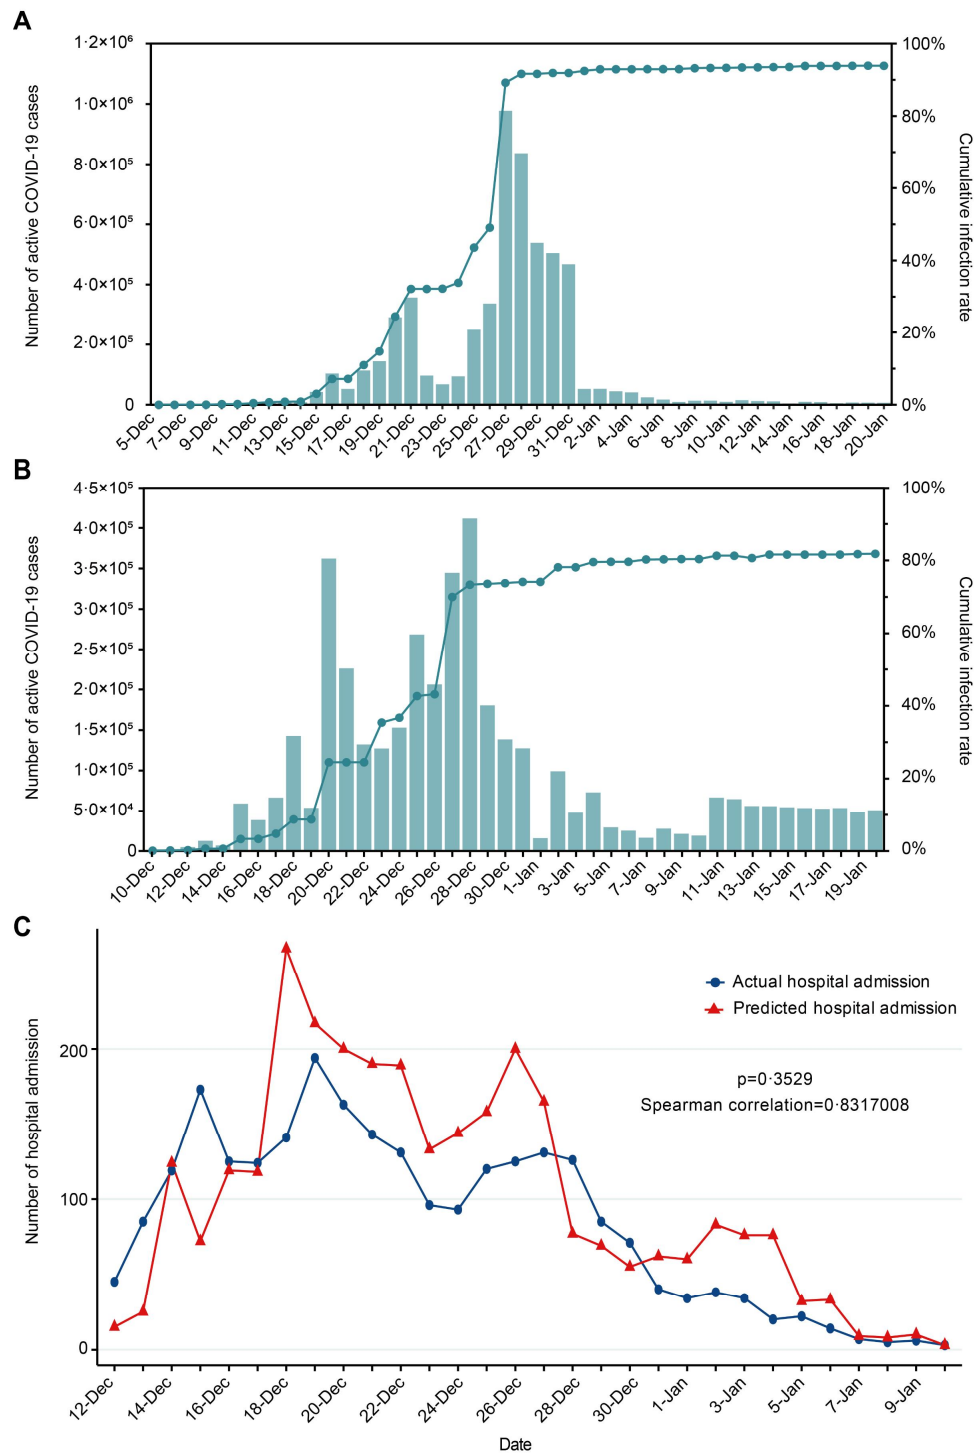

**Figure 4: Daily predicted active COVID-19 cases in two districts and predicted number of daily hospital admission in Nanshan District.**

Daily predicted COVID-19 cases and cumulative infection rate in Futian (A) and Nanshan District (B) based on wastewater data in Shenzhen, China (Dec 2022 - Jan 2023). Predicted values represented the median values of Monte Carol Simulation. 95% CI is not shown for clarity. (C) The predicted daily number of hospital admission vs actual daily number of hospital admission.

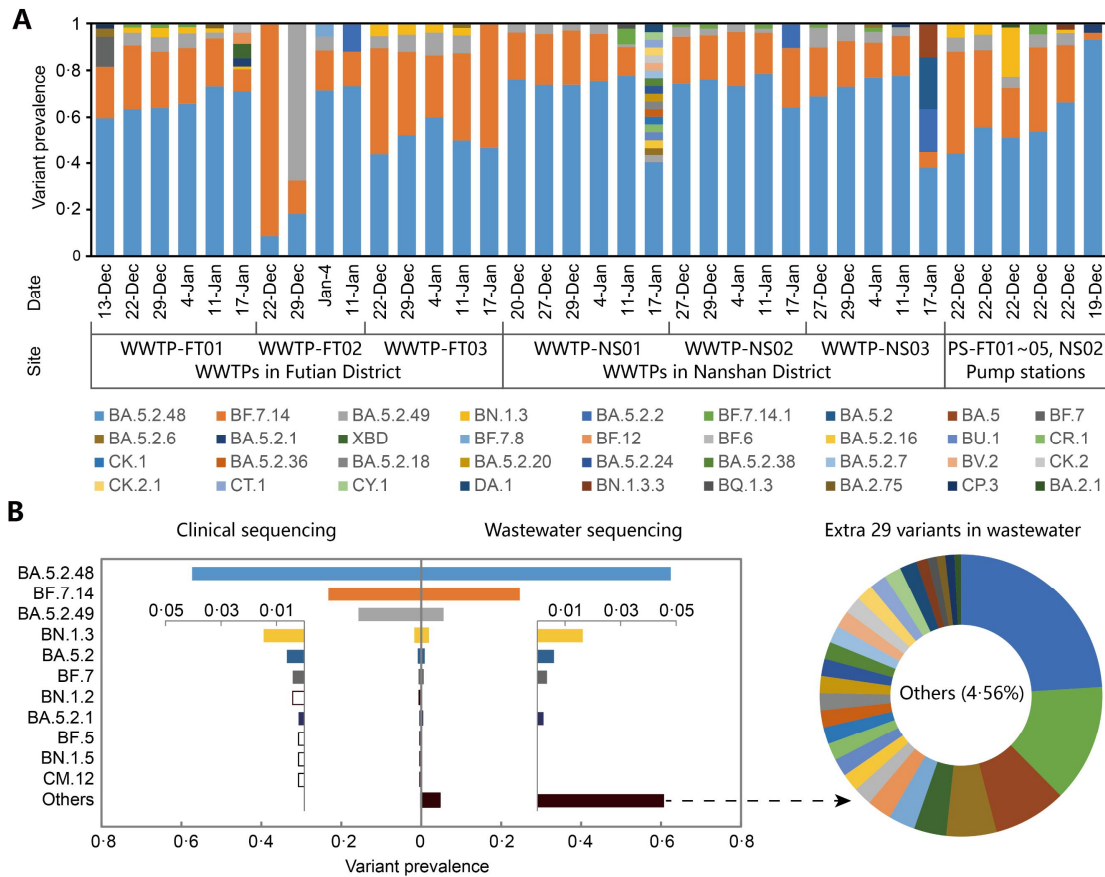

**Figure 5: Variant prevalence of representative wastewater samples and human oropharyngeal swab samples.**

(A) Variant prevalence of representative wastewater samples (n=37). (B) Comparison of variant prevalence between wastewater samples and human oropharyngeal swab samples (n=478). Solid bars indicated variants that could be identified in wastewater and hollow bars indicated that variants were not be identified in wastewater but identified by clinical sequencing.
